# Supplementary material for: Longitudinal, natural history study reveals the disease burden of idiopathic multicentric Castleman disease
Source: PubMed Central journal article supplement — Haematologica. 2024 Jan 11;109(7):2196–206. doi: 10.3324/haematol.2023.283603 (PMC11217716; doi:10.3324/haematol.2023.283603), 2024-01-11

# Longitudinal, natural history study reveals the disease burden of idiopathic multicentric Castleman disease

Mateo Sarmiento Bustamante,<sup>1\*</sup> Sheila K. Pierson,<sup>1\*</sup> Yue Ren,<sup>2</sup> Adam Bagg,<sup>3</sup> Joshua D. Brandstadter,<sup>4</sup> Gordan Srkalovic,<sup>5</sup> Natalie Mango,<sup>1</sup> Daisy Alapat,<sup>6</sup> Mary Jo Lechowicz,<sup>7</sup> Hongzhe Li,<sup>2</sup> Frits van Rhee,<sup>8</sup> Megan S. Lim<sup>9</sup> and David C. Fajgenbaum<sup>1</sup>

<sup>1</sup>Center for Cytokine Storm Treatment & Laboratory, Department of Medicine, Perelman School of Medicine, University of Pennsylvania, Philadelphia, PA; <sup>2</sup>Department of Biostatistics, Epidemiology, and Informatics, Perelman School of Medicine, University of Pennsylvania, Philadelphia, PA; <sup>3</sup>Department of Pathology and Laboratory Medicine, University of Pennsylvania, Philadelphia, PA; <sup>4</sup>Division of Hematology/Oncology, Perelman School of Medicine, University of Pennsylvania, Philadelphia, PA; <sup>5</sup>Sparrow Herbert-Herman Cancer Center, Michigan State University College of Human Medicine, Lansing, MI; <sup>6</sup>Department of Pathology, College of Medicine, University of Arkansas for Medical Sciences, Little Rock, AR; <sup>7</sup>Department of Hematology and Medical Oncology, Emory University School of Medicine and Winship Cancer Institute, Atlanta, GA; <sup>8</sup>Myeloma Center, Winthrop P. Rockefeller Cancer Institute, University of Arkansas for Medical Sciences, Little Rock, AR and <sup>9</sup>Department of Pathology and Laboratory Medicine, Memorial Sloan Kettering Cancer Center, New York City, NY, USA.

*\*MSB and SKP contributed equally as first authors.*

**Correspondence:** D.C. Fajgenbaum  
[davidfa@pennmedicine.upenn.edu](mailto:davidfa@pennmedicine.upenn.edu)

**Received:** June 13, 2023.

**Accepted:** December 29, 2023.

**Early view:** January 11, 2024.

<https://doi.org/10.3324/haematol.2023.283603>

©2024 Ferrata Storti Foundation

Published under a CC BY-NC license

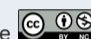

Supplemental Methods:

*Organ system involvement*

Organ system involvement was determined according to the presence of a sign, symptom, or laboratory abnormality that was recorded in the patient's medical record +/- 365 days from the date of a patient's diagnostic lymph node excision. Organ systems assessed include the renal, hepatic, ocular, cardiovascular, respiratory, gastrointestinal (GI), hematopoietic, and nervous systems. Clinical data was used to determine ocular, cardiovascular, respiratory, GI, and nervous system involvement, and laboratory data was used to determine additional kidney, liver and hematopoietic dysfunction  $\pm$  365 days from diagnostic excision. Renal involvement included any later described lab abnormality, dysuria, renal failure, and various other organ signs/symptoms. Hepatic involvement included any later described lab abnormality, jaundice, liver failure, and others. Ocular involvement included any visual disturbances, ocular bleeds, and others. GI involvement included abdominal pain, abdominal bloating/distention, nausea, vomiting, diarrhea, and others. Hematopoietic involvement included any later described lab abnormality, easy bruising, and others. Nervous system involvement included any form of neuropathy, delirium, confusion, mood changes, and others. For lab identified dysfunction, stage IIIb renal dysfunction was defined as an eGFR of  $< 45 \text{ mL/min/1.73}^2$  and/or a creatinine  $>2.0\text{mg/dL}$ . Liver dysfunction was defined as either aspartate aminotransferase (AST) and alanine aminotransferase (ALT)  $>2\text{x}$  upper limit of normal (ULN) and/or alkaline phosphatase  $>2\text{x}$  ULN. Anemia was defined as a hemoglobin of  $<12.5 \text{ g/dL}$  or  $<11.5 \text{ g/dL}$  for males and females, respectively. Thrombocytopenia and thrombocytosis were defined as platelets  $<150\text{k/uL}$  or  $>400\text{k/uL}$ , respectively. Leukopenia and leukocytosis were defined as a white blood cell count  $<4.5\text{k/uL}$  or  $>11\text{k/uL}$ , respectively.

Supplemental Table 1. Deceased patient information

|                                            | <b>iMCD (n=8)</b> | <b>TAFRO (n=6)</b> | <b>NOS (n=2)</b>  |
|--------------------------------------------|-------------------|--------------------|-------------------|
| <b>Age at death, years</b>                 |                   |                    |                   |
| Median (IQR)                               | 55.8 (28.3, 65.9) | 63.2 (27.7, 66.6)  | 41.5 (36.8, 46.1) |
| Range                                      | 14.7, 69.5        | 14.7, 69.5         | 32.2, 50.7        |
| <b>Time from diagnosis to death, years</b> |                   |                    |                   |
| Median (IQR)                               | 0.7 (0.1, 5.9)    | 0.2 (0.1, 1.0)     | 6.6 (5.9, 7.4)    |
| Range                                      | 0.05, 8.7         | 0.05, 8.7          | 5.2, 8.1          |

Supplemental Table 2. Disease severity by age group

| <b>Disease Severity:</b> | <b>&lt;30 years (n=37)</b> | <b>30-60 years (n=53)</b> | <b>&gt;60 years (n=10)</b> |
|--------------------------|----------------------------|---------------------------|----------------------------|
| Mild/moderate, n (%)     | 2 (5.4%)                   | 20 (37.7%)                | 1 (10.0%)                  |
| Severe, n (%)            | 35 (94.6%)                 | 33 (62.3%)                | 9 (90.0%)                  |

Supplemental Table 3. Clinical characteristics

| Clinical Minor Criteria                 | iMCD (n=102)           |            |    | TAFRO (n=61)           |            |    | NOS (n=41)              |            |    | p-value               |
|-----------------------------------------|------------------------|------------|----|------------------------|------------|----|-------------------------|------------|----|-----------------------|
|                                         | Yes, n (%)             | No, n (%)  | NA | Yes, n (%)             | No, n (%)  | NA | Yes, n (%)              | No, n (%)  | NA |                       |
| Constitutional Sx                       | 94 (93.1)              | 7 (6.9)    | 1  | 59 (96.7)              | 2 (3.3)    | 0  | 35 (87.5)               | 5 (12.5)   | 1  | 0.1101                |
| Fatigue                                 | 87 (90.6)              | 9 (9.4)    | 6  | 56 (92.2)              | 1 (1.8)    | 4  | 31 (79.5)               | 8 (20.5)   | 2  | 0.0029                |
| Night sweats                            | 60 (65.9)              | 31 (34.1)  | 11 | 35 (62.5)              | 21 (37.5)  | 5  | 25 (71.4)               | 10 (28.6)  | 3  | 0.3819                |
| Fever                                   | 70 (70.7)              | 29 (29.3)  | 3  | 50 (82.0)              | 11 (18.0)  | 0  | 20 (52.6)               | 18 (47.4)  | 3  | 0.0018                |
| Weight loss                             | 50 (52.6)              | 45 (47.4)  | 7  | 31 (54.4)              | 26 (45.6)  | 4  | 19 (50.0)               | 19 (50.0)  | 3  | 0.6749                |
| Organomegaly                            | 77 (77.8)              | 22 (22.2)  | 3  | 55 (90.2)              | 6 (9.8)    | 0  | 22 (57.9)               | 16 (42.1)  | 3  | 2.0x10 <sup>-4</sup>  |
| Hepatomegaly                            | 59 (60.2)              | 39 (39.8)  | 4  | 46 (76.7)              | 14 (23.3)  | 1  | 13 (34.2)               | 25 (65.8)  | 3  | 3.0x10 <sup>-5</sup>  |
| Splenomegaly                            | 71 (71.7)              | 28 (28.3)  | 3  | 52 (85.2)              | 9 (14.8)   | 0  | 19 (50.0)               | 19 (50.0)  | 3  | 1.5x10 <sup>-4</sup>  |
| CD Skin Disorder                        | 3 (3.5)                | 82 (96.5)  | 17 | 3 (5.8)                | 49 (94.2)  | 9  | 0                       | 33 (100.0) | 8  | 0.279                 |
| LIP                                     | 0 (0.0)                | 67 (100.0) | 35 | 0 (0.0)                | 46 (100.0) | 15 | 0 (0.0)                 | 21 (100.0) | 20 | 1.0                   |
| Fluid Retention                         | 81 (83.5)              | 16 (16.5)  | 5  | 60 (98.4)              | 1 (1.6)    | 0  | 21 (58.3)               | 15 (41.7)  | 5  | <0.00001              |
| Proteinuria                             | 55 (70.5)              | 23 (29.5)  | 24 | 40 (72.7)              | 15 (27.3)  | 6  | 15 (65.2)               | 8 (34.8)   | 18 | 0.5072                |
| <b>Lab Minor Criteria, Median (IQR)</b> |                        |            |    |                        |            |    |                         |            |    |                       |
| CRP mg/L                                | 132.4 (32.5, 216.7)    |            |    | 167.0 (42.8, 266.0)    |            |    | 61.0 (10.6, 160.7)      |            |    | 0.004                 |
| ESR mm/hr                               | 82.0 (49.5, 114.3)     |            |    | 91.0 (67.0, 118.0)     |            |    | 69.0 (31.0, 105.0)      |            |    | 0.024                 |
| Hemoglobin g/dL                         | 7.8 (6.6, 10.5)        |            |    | 6.8 (6.5, 8.0)         |            |    | 10.5 (8.3, 11.9)        |            |    | 2.0x10 <sup>-7</sup>  |
| Platelets max k/ $\mu$ L                | 300.0 (246.0, 401.0)   |            |    | 271.0 (224.0, 331.0)   |            |    | 380.0 (293.0, 462.0)    |            |    | 1.3x10 <sup>-4</sup>  |
| Platelets min k/ $\mu$ L                | 64.0 (23.0, 169.0)     |            |    | 28.0 (15.0, 58.0)      |            |    | 212.0 (139.0, 325.0)    |            |    | 2.8x10 <sup>-15</sup> |
| Albumin g/dL                            | 2.2 (1.8, 2.9)         |            |    | 1.9 (1.6, 2.3)         |            |    | 2.9 (2.4, 3.7)          |            |    | 7.4x10 <sup>-8</sup>  |
| Creatinine mg/dL                        | 1.6 (1.1, 2.6)         |            |    | 2.1 (1.5, 3.5)         |            |    | 1.1 (0.8, 1.3)          |            |    | 8.1x10 <sup>-8</sup>  |
| eGFR mL/min1.73m <sup>2</sup>           | 51.0 (24.5, 60.0)      |            |    | 33.6 (17.0, 60.0)      |            |    | 60.0 (56.0, 60.0)       |            |    | 4.0x10 <sup>-4</sup>  |
| IgG mg/dL                               | 1324.0 (897.5, 2079.8) |            |    | 1060.0 (784.8, 1527.5) |            |    | 2084.5 (1204.8, 3604.0) |            |    | 3.3x10 <sup>-5</sup>  |
| Gammaglobulin g/dL                      | 1.4 (0.9, 2.47)        |            |    | 1.19 (0.9, 1.7)        |            |    | 2.6 (1.2, 4.4)          |            |    | 0.01                  |

Supplemental Table 4. Regimen effect on hospitalizations

|                                      | <b>Hospitalized at regimen initiation</b> | <b>Hospitalized four-weeks post regimen initiation</b> | <b>p-value</b>       |
|--------------------------------------|-------------------------------------------|--------------------------------------------------------|----------------------|
| <b>All regimens</b>                  | 49/99 (49.5)                              | 20/99 (20.2)                                           | 3.0x10 <sup>-5</sup> |
| Siltuximab ± corticosteroids         | 11/32 (34.4)                              | 2/32 (6.3)                                             | 0.01                 |
| Tocilizumab ± corticosteroids        | 7/10 (70.0)                               | 3/10 (30.0)                                            | 0.18                 |
| Rituximab ± corticosteroids          | 4/16 (25.0)                               | 0/16 (0.0)                                             | 0.10                 |
| Chemotherapy-based                   | 9/13 (69.2)                               | 6/13 (46.2)                                            | 0.43                 |
| Immunomodulator(s) ± corticosteroids | 6/10 (60.0)                               | 2/10 (20.0)                                            | 0.17                 |
| Other                                | 12/19 (63.1)                              | 7/19 (36.8)                                            | 0.18                 |

Supplemental Table 5. Forms of organ system involvement experienced by iMCD patients

| <b>Organ Sign/Symptom<br/>(N, %)</b> | <b>iMCD<br/>(N=102)</b> | <b>TAFRO<br/>(N=61)</b> | <b>NOS<br/>(N=41)</b> |
|--------------------------------------|-------------------------|-------------------------|-----------------------|
| <b>Cardiovascular</b>                | <b>68 (66.7)</b>        | <b>49 (80.3)</b>        | <b>19 (46.3)</b>      |
| Tachycardia                          | 51 (50.0)               | 40 (65.6)               | 11 (26.8)             |
| Abnormal EKG/ECG                     | 20 (19.6)               | 15 (24.6)               | 5 (12.2)              |
| Hypertension                         | 13 (12.7)               | 9 (14.8)                | 4 (9.8)               |
| Cardiomegaly                         | 11 (10.8)               | 7 (11.5)                | 4 (9.8)               |
| Hypotension                          | 9 (8.8)                 | 7 (11.5)                | 2 (4.9)               |
| Palpitations                         | 9 (8.8)                 | 3 (4.9)                 | 6 (14.6)              |
| Heart failure                        | 4 (3.9)                 | 3 (4.9)                 | 1 (2.4)               |
| Bradycardia                          | 3 (2.9)                 | 2 (3.3)                 | 1 (2.4)               |
| Injury to heart from strain          | 3 (2.9)                 | 3 (3.9)                 | 0                     |
| Pericardial effusion                 | 3 (2.9)                 | 2 (3.3)                 | 1 (2.4)               |
| Endotheliopathy                      | 1 (1.0)                 | 0                       | 0                     |
| Coronary artery disease              | 1 (1.0)                 | 0                       | 1 (2.4)               |
| JVD                                  | 1 (1.0)                 | 0                       | 1 (2.4)               |
| Pericarditis                         | 1 (1.0)                 | 1 (1.6)                 | 0                     |
| Right hemisphere infarct             | 1 (1.0)                 | 1 (1.6)                 | 0                     |
| <b>Gastrointestinal</b>              | <b>86 (84.3)</b>        | <b>57 (93.4)</b>        | <b>28 (68.3)</b>      |
| Abdominal Pain/Bloating/N/V/D        | 83 (81.4)               | 56 (91.8)               | 27 (65.9)             |
| Cholelithiasis                       | 4 (3.9)                 | 3 (4.9)                 | 1 (2.4)               |
| Retroperitoneal hematoma             | 2 (2.0)                 | 2 (3.3)                 | 0                     |
| Ileus                                | 1 (1.0)                 | 1 (1.6)                 | 0                     |
| Colonic ischemia                     | 1 (1.0)                 | 1 (1.6)                 | 0                     |
| <b>Hematopoietic</b>                 | <b>99 (97.1)</b>        | <b>61 (100.0)</b>       | <b>38 (62.3)</b>      |
| Lab dysfunction                      | 99 (97.1)               | 61 (100.0)              | 38 (62.3)             |

|                                                                                                  |                  |                  |                  |
|--------------------------------------------------------------------------------------------------|------------------|------------------|------------------|
| <b>Bruise</b>                                                                                    |                  |                  |                  |
| easily/anemia/bleed                                                                              | 12 (11.8)        | 7 (11.5)         | 5 (12.2)         |
| easily                                                                                           |                  |                  |                  |
| Epistaxis                                                                                        | 8 (7.8)          | 5 (8.2)          | 3 (7.3)          |
| Body aches/myalgias                                                                              | 5 (4.9)          | 4 (6.6)          | 1 (2.4)          |
| Cold/heat intolerance                                                                            | 3 (2.9)          | 2 (3.3)          | 1 (2.4)          |
| Bone marrow failure                                                                              | 1 (1.0)          | 1 (1.6)          | 0                |
| Reynaud's                                                                                        | 1 (1.0)          | 1 (1.6)          | 0                |
| <b>Hepatic</b>                                                                                   | <b>76 (74.5)</b> | <b>55 (90.2)</b> | <b>23 (37.7)</b> |
| Hepatomegaly                                                                                     | 69 (67.6)        | 49 (80.3)        | 20 (48.8)        |
| Lab dysfunction                                                                                  | 28 (27.5)        | 24 (39.3)        | 4 (9.8)          |
| Jaundice                                                                                         | 2 (2.0)          | 2 (3.3)          | 0                |
| Cirrhotic liver/liver pain                                                                       | 2 (2.0)          | 0                | 2 (4.9)          |
| Acute liver failure                                                                              | 1 (1.0)          | 1 (1.6)          | 0                |
| <b>Neurological</b>                                                                              | <b>68 (66.7)</b> | <b>38 (62.3)</b> | <b>30 (73.2)</b> |
| Neuropathy                                                                                       | 38 (37.3)        | 22 (36.1)        | 16 (39.0)        |
| Headache/migraine                                                                                | 38 (37.3)        | 24 (39.3)        | 14 (34.1)        |
| Altered mental status,<br>confusion, dizziness,<br>lightheadedness, brain<br>fog, hallucinations | 25 (24.5)        | 15 (24.6)        | 10 (24.4)        |
| Insomnia                                                                                         | 9 (8.8)          | 7 (11.5)         | 2 (4.9)          |
| Anxiety/Depression/Ne<br>rvousness/Mood<br>change                                                | 9 (8.8)          | 7 (1.5)          | 2 (4.9)          |
| Generalized weakness                                                                             | 7 (6.9)          | 5 (8.2)          | 2 (4.9)          |
| Seizures                                                                                         | 5 (4.9)          | 5 (8.2)          | 0                |
| Gross motor delay                                                                                | 2 (2.0)          | 2 (3.3)          | 0                |
| Tremors                                                                                          | 2 (2.0)          | 2 (3.3)          | 0                |
| Brain coma                                                                                       | 1 (1.0)          | 1 (1.6)          | 0                |
| <b>Ocular</b>                                                                                    | <b>27 (26.5)</b> | <b>19 (31.1)</b> | <b>8 (19.5)</b>  |

|                                                                                         |                  |                  |                  |
|-----------------------------------------------------------------------------------------|------------------|------------------|------------------|
| <b>Blurred vision/vision changes/visual disturbance</b>                                 | <b>22 (21.6)</b> | 15 (24.6)        | 7 (17.1)         |
| <b>Conjunctival pallor, conjunctival injection</b>                                      | <b>5 (4.9)</b>   | 4 (6.6)          | 1 (2.4)          |
| <b>scleral icterus</b>                                                                  | <b>1 (1.0)</b>   | 1 (1.6)          | 0                |
| <b>conjunctival hemorrhage</b>                                                          | <b>1 (1.0)</b>   | 1 (1.6)          | 0                |
| <b>Left eye pain</b>                                                                    | <b>1 (1.0)</b>   | 0                | 1 (2.4)          |
| <b>Renal</b>                                                                            | <b>63 (61.8)</b> | <b>48 (78.7)</b> | <b>15 (36.6)</b> |
| <b>Lab dysfunction</b>                                                                  | <b>49 (48.0)</b> | 39 (63.9)        | 5 (12.2)         |
| <b>Dysuria, change in appearance of urine, increased or decreased urinary frequency</b> | <b>24 (23.5)</b> | 17 (27.9)        | 7 (17.1)         |
| <b>Acute renal failure/insufficiency/dysfunction</b>                                    | <b>21 (20.6)</b> | 18 (29.5)        | 3 (7.3)          |
| <b>Adrenal gland hemorrhage/renal vein thrombosis</b>                                   | <b>2 (2.0)</b>   | 2 (3.3)          | 0                |
| <b>Kidney stones/kidney obstruction /kidney pain/</b>                                   | <b>4 (3.9)</b>   | 2 (3.3)          | 0                |
| <b>Renal cyst</b>                                                                       | <b>2 (2.0)</b>   | 0                | 2 (4.9)          |
| <b>Cushingoid Appearance</b>                                                            | <b>2 (2.0)</b>   | 2 (3.3)          | 2 (4.9)          |
| <b>Histiocytic glomerulopathy</b>                                                       | <b>1 (1.0)</b>   | 1 (1.6)          | 0                |
| <b>Membrane-proliferative glomerulonephritis</b>                                        | <b>1 (1.0)</b>   | 0                | 0                |
| <b>Thrombotic microangiopathy</b>                                                       | <b>1 (1.0)</b>   | 1 (1.6)          | 1 (2.4)          |



|                                                          |                  |                  |                  |
|----------------------------------------------------------|------------------|------------------|------------------|
| <b>Respiratory</b>                                       | <b>90 (88.2)</b> | <b>58 (95.1)</b> | <b>32 (78.0)</b> |
| Dyspnea                                                  | 85 (83.3)        | 56 (91.8)        | 29 (70.7)        |
| Atelectasis                                              | 46 (45.1)        | 38 (62.3)        | 8 (19.5)         |
| Cough                                                    | 41 (40.2)        | 24 (39.3)        | 17 (41.5)        |
| Chest Pain                                               | 31 (30.4)        | 21 (34.4)        | 10 (24.4)        |
| URI symptoms<br>(congestion, runny<br>nose, sore throat) | 24 (23.5)        | 15 (24.6)        | 9 (22.0)         |
| Diminished/decreased<br>breath sounds                    | 10 (9.8)         | 8 (13.1)         | 2 (4.9)          |
| Rales, rhonchi,<br>wheezing, crackles,<br>rub, stridor   | 10 (9.8)         | 6 (9.8)          | 4 (9.8)          |
| Hypoxia/O2<br>requirement                                | 6 (5.9)          | 5 (8.2)          | 1 (2.4)          |
| Pulmonary Edema                                          | 6 (5.9)          | 5 (8.2)          | 1 (2.4)          |
| Pulmonary nodules                                        | 4 (3.9)          | 2 (3.3)          | 2 (4.9)          |
| Respiratory failure                                      | 4 (3.9)          | 4 (6.6)          | 0                |
| Pleurisy                                                 | 4 (3.9)          | 1 (1.6)          | 3 (7.3)          |
| Bilateral ground glass<br>opacities                      | 3 (2.9)          | 3 (4.9)          | 0                |
| Pneumothorax                                             | 1 (1.0)          | 0                | 1 (2.4)          |
| <b>Other Dysfunctions</b>                                | <b>11 (10.8)</b> | <b>7 (11.5)</b>  | <b>4 (9.8)</b>   |
| Penile/scrotal pain                                      | 6 (5.9)          | 5 (8.2)          | 1 (2.4)          |
| Back pain                                                | 5 (4.9)          | 3 (4.9)          | 2 (4.9)          |
| Mouth sores/ulcers                                       | 3 (2.9)          | 2 (3.3)          | 1 (2.4)          |
| Ear bleeding                                             | 1 (1.0)          | 1 (1.6)          | 0                |
| Sclerotic lesions                                        | 1 (1.0)          | 0                | 1 (2.4)          |

Supplemental Table 6. Laboratory values for identified organ dysfunction

| <b>Lab Identified Dysfunction</b>                        | <b>Unique patients meeting lab dysfunction criteria, n (%)</b> | <b>Lab Values</b>                                      |
|----------------------------------------------------------|----------------------------------------------------------------|--------------------------------------------------------|
| <b>Liver Dysfunction</b>                                 | <b>28 (27.5)</b>                                               |                                                        |
| Alk Phos<br>(U/L, Median, IQR)                           | 24 (37.3)                                                      | 566 (473.3, 841.5)                                     |
| ALT and AST<br>(U/L, Median, IQR)                        | 16 (29.4)                                                      | ALT: 199.0 (138.0, 273.3)<br>AST: 164.0 (134.0, 262.8) |
| <b>Kidney Dysfunction</b>                                | <b>49 (48.0)</b>                                               |                                                        |
| Creatinine<br>(mg/dL, Median, IQR)                       | 42 (41.2)                                                      | 3.3 (2.4, 5.0)                                         |
| eGFR<br>(mL/min/1.73 m <sup>2</sup> , Median, IQR)       | 38 (37.3)                                                      | 19.5 (15.3, 31.9)                                      |
| <b>Hematopoietic Dysfunction</b>                         | <b>99 (97.1)</b>                                               |                                                        |
| Anemia<br>(Hemoglobin, g/dL, Median, IQR)                | 87 (85.3)                                                      | 7.1 (6.5, 8.7)                                         |
| Thrombocytopenia<br>(Platelets, k/ $\mu$ L, Median, IQR) | 76 (74.5)                                                      | 32.0 (17.5, 67.0)                                      |
| Thrombocytosis<br>(Platelets, k/ $\mu$ L, Median, IQR)   | 37 (36.3)                                                      | 484.0 (427.0, 605.0)                                   |
| Leukocytosis<br>(WBC, k/ $\mu$ L, Median, IQR)           | 80 (78.4)                                                      | 23.0 (15.6, 30.1)                                      |
| Leukopenia (WBC, k/ $\mu$ L, Median, IQR)                | 56 (54.9)                                                      | 2.8, (1.2, 3.6)                                        |

Supplemental Table 7. Top 3 iMCD-related morbidities and comorbidities arising following disease onset by organ system

| <b>iMCD-related morbidities and comorbidities following diagnosis (N, %)</b> | <b>iMCD (n=102)</b> |
|------------------------------------------------------------------------------|---------------------|
| <b>Cardiac</b>                                                               |                     |
| Hypertension                                                                 | 12 (11.7)           |
| Congestive Heart Failure                                                     | 4 (3.9)             |
| Cardiac Arrhythmia                                                           | 3 (2.9)             |
| <b>Respiratory</b>                                                           |                     |
| Pneumonia                                                                    | 10 (9.8)            |
| Obstructive Sleep Apnea                                                      | 7 (6.9)             |
| Respiratory Failure                                                          | 3 (2.9)             |
| <b>Renal</b>                                                                 |                     |
| Acute Renal Failure                                                          | 49 (48.0)           |
| Chronic Kidney Disease                                                       | 12 (11.8)           |
| Kidney Stone                                                                 | 3 (3.8)             |
| <b>Gastrointestinal</b>                                                      |                     |
| Gastritis                                                                    | 5 (4.9)             |
| Acute Cholecystitis                                                          | 5 (4.9)             |
| Gastroesophageal Reflux Disease                                              | 5 (4.9)             |
| <b>Hematopoietic</b>                                                         |                     |
| Iron Deficiency Anemia                                                       | 14 (13.7)           |
| Thrombotic Microangiopathy                                                   | 7 (6.9)             |
| Atypical Hemolytic Uremic Syndrome                                           | 5 (4.9)             |
| <b>Endocrine/Metabolic</b>                                                   |                     |
| Hypothyroidism                                                               | 8 (7.8)             |
| Vitamin D Deficiency                                                         | 7 (6.9)             |
| Type II Diabetes                                                             | 5 (4.9)             |
| <b>Infectious</b>                                                            |                     |
| Sepsis                                                                       | 7 (6.9)             |
| COVID-19                                                                     | 5 (4.9)             |
| Clostridium difficile colitis                                                | 4 (4.9)             |
| <b>Mood Disorder</b>                                                         |                     |
| Depressive Disorder (Depression)                                             | 9 (8.8)             |
| Post-Traumatic Stress Disorder                                               | 4 (3.9)             |
| Anxiety Disorder                                                             | 4 (3.9)             |

Supplemental Table 8. Malignancies following iMCD diagnosis

| <b>Patient</b>    | <b>Malignancy</b>                    | <b>Time from iMCD diagnosis to Malignancy (in days)</b> |
|-------------------|--------------------------------------|---------------------------------------------------------|
| Patient 1 (TAFRO) | Myelodysplastic Syndrome             | 1140                                                    |
| Patient 2 (NOS)   | Papillary Thyroid Carcinoma          | 1314                                                    |
| Patient 3 (TAFRO) | Papillary Thyroid Carcinoma          | 480                                                     |
| Patient 4 (NOS)   | Primary malignant neoplasm of rectum | 513                                                     |
| Patient 5 (TAFRO) | Inflammatory Myofibroblastic Tumor   | 865                                                     |
| Patient 6 (NOS)   | Malignant Lymphoma                   | 2950                                                    |
| Patient 7 (NOS)   | Basal Cell Carcinoma*                | 530                                                     |
| Patient 8 (TAFRO) | Thymoma*                             | 71                                                      |
| Patient 9 (NOS)   | Tubular Adenoma*                     | 927                                                     |
| Patient 9 (NOS)   | Polyp of Colon*                      | 927                                                     |
| Patient 10 (NOS)  | Thyroid Nodule*                      | 423                                                     |

\*Premalignant or precancerous findings are included to better represent patients at-risk for cancer

Supplemental Figure 1. Comorbidities diagnosed prior to iMCD diagnosis

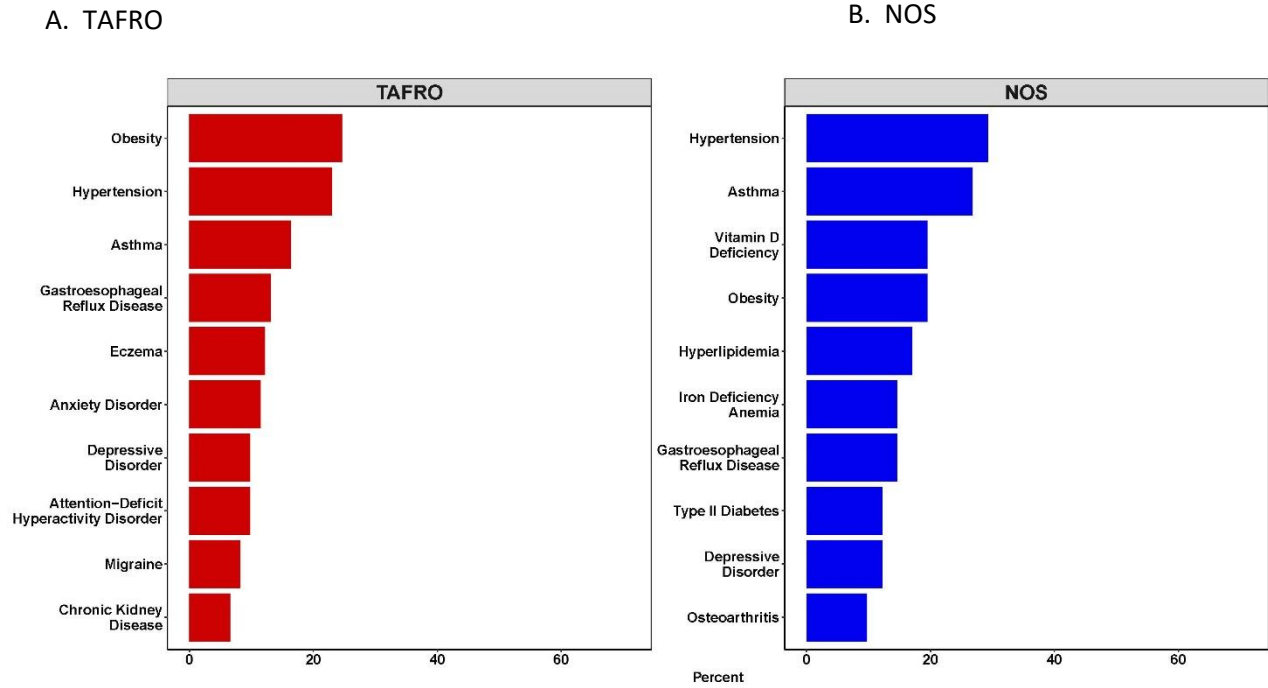

Top 10 most frequently observed comorbidities among iMCD patients prior to diagnosis with iMCD. Data presented in rank order for (A) TAFRO and (B) NOS patients.

Supplemental Figure 2. Comorbidities and Morbidities diagnosed after iMCD diagnosis

A. TAFRO

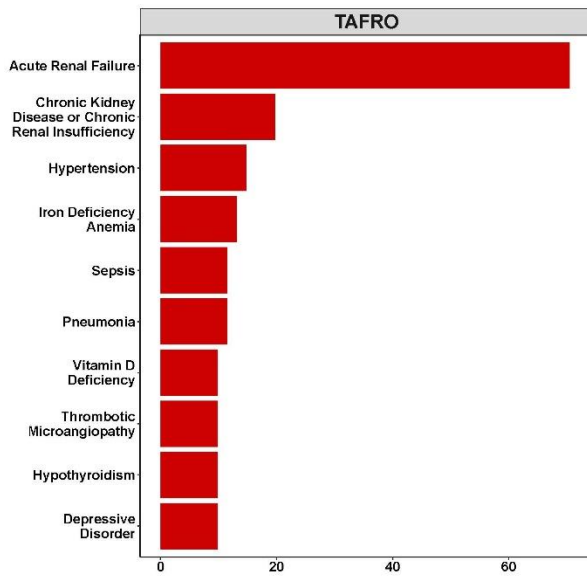

B. NOS

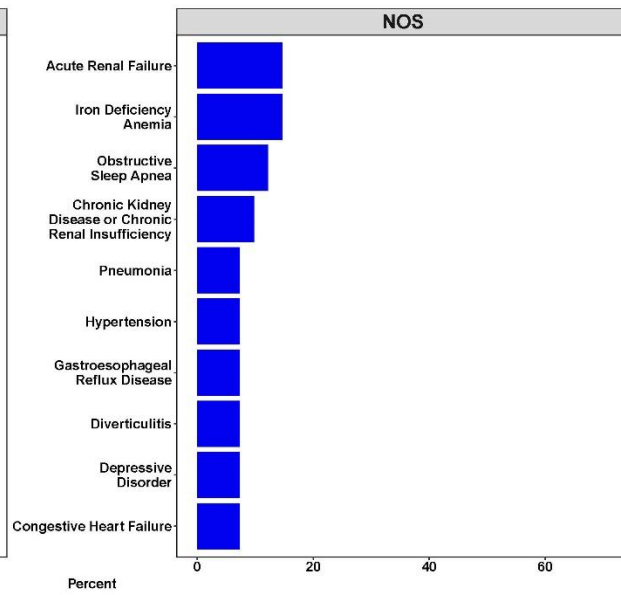

Top 10 most frequently observed comorbidities and morbidities among iMCD patients after diagnosis with iMCD. Data presented in rank order for (A) TAFRO and (B) NOS patients.

Supplemental Figure 3. Correlation between days hospitalized prior to survey completion and self-reported quality of life score

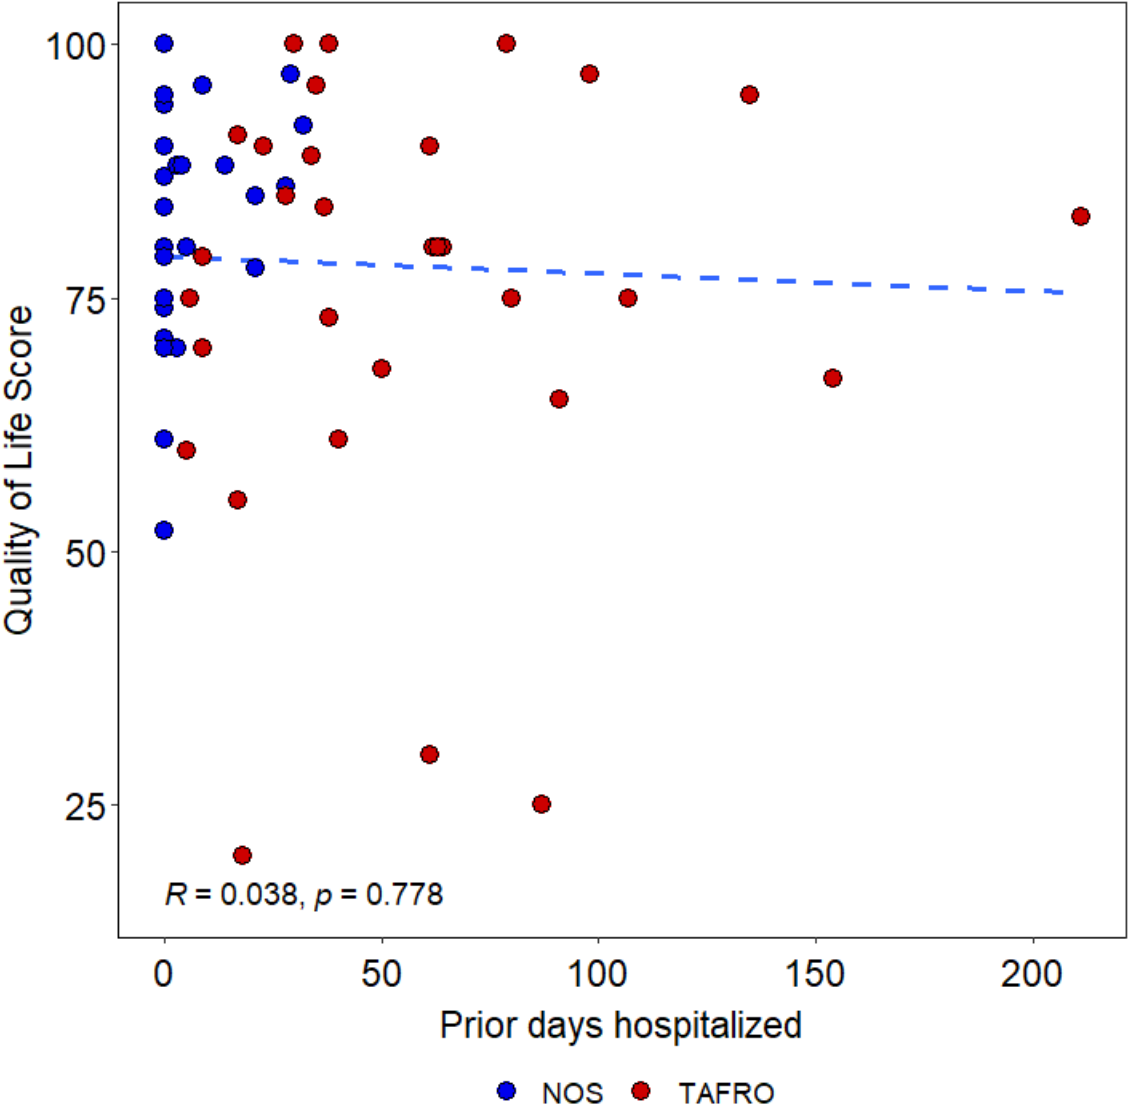

Supplement: 2023_283603_BUSTAMANTE_SUPPL.pdf [file 2023_283603_BUSTAMANTE_SUPPL.pdf]
